# Supplementary material for: Force and kinetics of fast and slow muscle myosin determined with a synthetic sarcomere–like nanomachine
Source: PubMed Central journal article supplement (PMC10960843; doi:10.1038/s42003-024-06033-8), 2024-03-23
Supplement: 42003_2024_6033_MOESM3_ESM.pdf [file 42003_2024_6033_MOESM3_ESM.pdf]

## **Description of Additional Supplementary Files**

**File name:** Supplementary Data 1

**Description:** The source data behind the graphs in the paper.
